# Supplementary material
Source: Royal Society of Chemistry journal article supplement (doi:10.1039/d6el00076b)
Supplement: d6el00076b1.pdf [file d6el00076b1.pdf]

# 1 A new era in solar fuels: battery pushes PV-driven CO<sub>2</sub> reduction beyond its limits

2 Thérèse Cibaka<sup>a,d</sup>, Tsvetelina Merdzhanova<sup>a\*</sup>, Oleksandr Astakhov<sup>a</sup>, Robert Zandonella<sup>b</sup>, Sergey Shcherbachenko<sup>a,c</sup>,  
3 Paul Paciok<sup>b</sup>, Marc Heggen<sup>b</sup>, Rafal Dunin-Borkowski<sup>b</sup>, Christoph Brabec<sup>a</sup>, Peter Strasser<sup>d</sup>

4 (a) Forschungszentrum Jülich GmbH, IMD-3 Photovoltaik, Jülich, Germany.

5 (b) Forschungszentrum Jülich GmbH, Ernst Ruska-Centre, Jülich, Germany.

6 (c) Jülich Aachen Research Alliance (JARA-Energy) and Faculty of Electrical Engineering and Information Technology, RWTH Aachen University,  
7 Aachen, Germany.

8 (d) Technical University of Berlin, Institute of Chemistry, Berlin, Germany

9 \* t.merdzhanova@fz-juelich.de

10

11

## 12 Supplementary information

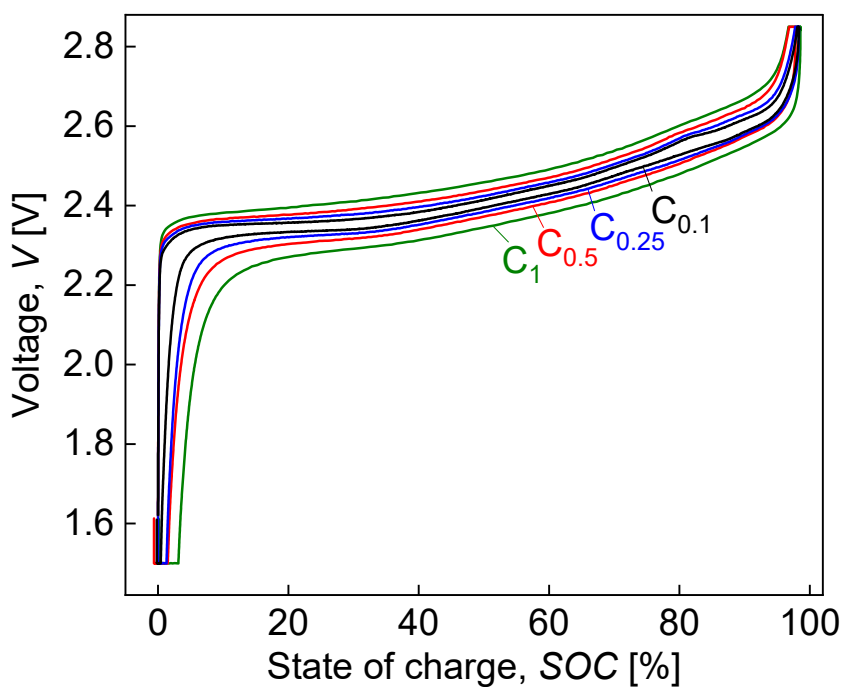

13

14

Figure S1. Charge-discharge curves of the Li-ion Battery at C1, C0.5, C0.25 and C0.1.

15

16

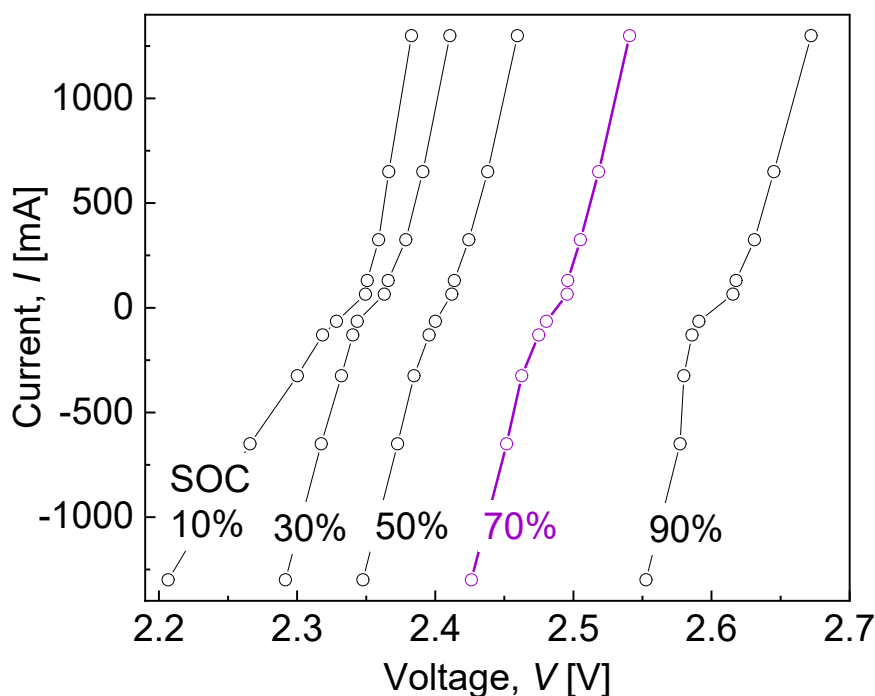

17

18

Figure S2 Current-Voltage curves of the Li-ion Battery at state-of-charge 10%, 30%, 50% 70% and 90%

19

20

### 21 Preparation of Silver gas diffusion electrode

22 The catalyst ink was an ultrasonication-based dispersion of silver catalyst powder (IoLiTec, 50-60 nm, 99.9  
 23 %), nafion (Quintech), isopropanol (Sigma Aldrich, AR) and water (MilliporeSigma, Mili-Q®, IQ7000, 18.2  
 24 MΩ.cm). Gas diffusion electrodes (GDE) were fabricated by air-spraying the catalyst ink with a load of  
 25 approximately 1.5 mg/cm<sup>2</sup> to 2 mg/cm<sup>2</sup> on cut GDLs (Freudenberg, H23C2) with area of 9.5 cm<sup>2</sup>. During  
 26 the catalyst deposition, the GDL were maintained and dried on a heating plate at 60°C to allow fast  
 27 evaporation of water and isopropanol.

28

29

30

31

32

33

34 **Electrochemical cell**

35

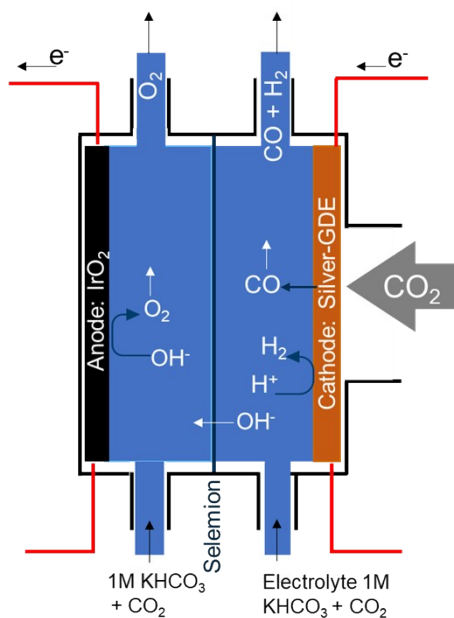

36

37 Figure S3. Electrochemical flow-cell consisting of cathode (Silver-GDE), anode (IrO2) and Selemion - anion exchange membrane  
38 separating both electrodes. Electrolyte is CO<sub>2</sub>-saturated 1M KHCO<sub>3</sub> electrolyte. CO<sub>2</sub> reduction and oxygen evolution take place  
39 at cathode and anode respectively.

40

41

42

43

44

45

46

47

48

49

50

51

52

53 **Representative Irradiance and Temperature Profiles for PV Emulation**

54

**Table S1. Hypothetical summer day simulated in terms of irradiance and module temperature combinations**

|                  | Irradiance, sun | Temperature, °C |
|------------------|-----------------|-----------------|
| <b>Morning</b>   | 0.2             | 20              |
|                  | 0.4             | 27              |
|                  | 0.6             | 34              |
|                  | 0.8             | 42.8            |
| <b>Noon</b>      | 1.0             | 49.8            |
|                  | 1.1             | 53.3            |
|                  | 1.0             | 53.3            |
| <b>Afternoon</b> | 0.8             | 49.8            |
|                  | 0.6             | 42.8            |
|                  | 0.4             | 35.8            |
|                  | 0.2             | 28.8            |

55

56

57 **System efficiency evaluation**

58 PV-EC and PV-B-EC systems efficiency are evaluated and compared in terms of solar-to-chemicals (STC)  
59 efficiency and coupling factor.

60 **PV-EC**

61 For PV-EC operation, the STC is determined by multiplying the efficiency of the PV system ( $\eta_{PV}$ ), the PV-EC  
 62 coupling efficiency ( $C$ ), and the efficiency of the electrochemical conversion ( $\eta_{EC}$ ), as shown in equations  
 63 (3 - 10) below. The PV efficiency represents the proportion of incident solar power on the exposed surface  
 64 of the photovoltaic system that is converted into electrical power at the maximum power point.

$$65 \quad \eta_{PV} = \frac{V_{MPP} I_{MPP}}{A_{PV} G} = \frac{P_{MPP}}{A_{PV} G} \quad (3),$$

66 where  $V_{MPP}$ ,  $I_{MPP}$  and  $P_{MPP}$  are voltage, current and power of PV at the maximum power point,  $A_{PV}$  is the  
 67 exposed area of PV module and  $G$  is solar irradiance.

68 PV-EC power coupling efficiency defines the fraction of the maximum power that the PV system can  
 69 deliver which is effectively used by the electrochemical process at the operating point.

$$70 \quad C = \frac{V_{OP} I_{OP}}{V_{MPP} I_{MPP}} \quad (4),$$

71 Where  $V_{OP}$  and  $I_{OP}$  are voltage and current of EC at the operating point. To obtain operating current density  
 72  $J_{OP}$ ,  $I_{OP}$  is divided by the area of EC, 9.5 cm<sup>2</sup>.

73 PV-EC energy coupling efficiency represents how much of the maximum energy deliverable by PV is  
 74 actually being utilized by EC during operating time.

$$75 \quad C = \frac{\int V_{OP} I_{OP}}{\int V_{MPP} I_{MPP}} = \frac{E_{OP}}{E_{MPP}} \quad (5)$$

76 Faradaic efficiency (or selectivity),  $FE_p$ , of a chemical product evaluates which fraction of the operating  
 77 current ( $I_{OP}$ ) is utilized for the formation of that specific chemical (H<sub>2</sub> or CO),

$$78 \quad FE_p = \frac{n \times x_p \times F \times CO_2 \text{ flowrate}}{I_{OP}} \quad (6),$$

79 Where  $n$  is the number of electrons required to obtain one molecule of the specific chemical (CO or H<sub>2</sub>),  
 80  $x_p$  is the concentration of that chemical in ppm,  $F$  is the faradaic constant (96485 C/mol).

81 EC efficiency for a specific product ( $\eta_{ECp}$ ) is determined by the product of faradaic efficiency and voltage  
 82 efficiency for that particular chemical.  $\eta_{ECp}$  represents the proportion of the operating power (voltage and  
 83 current) effectively utilized for the production of the specific chemical (Equation 7).

$$84 \quad \eta_{ECp} = \frac{FE_p E_p^0}{V_{OP}} \quad (7),$$

85 Where  $E_p^0$  is the thermoneutral voltage for that chemical,  $E^0$  is 1.47V for H<sub>2</sub> and CO.

86 The overall EC efficiency  $\eta_{EC}$ , is the sum of all  $\eta_{ECp}$ .

$$87 \quad \eta_{EC} = \sum \eta_{ECp} \quad (8),$$

88 *STC* towards individual product is  $STC_p$  and *STC* towards all products.

$$89 \quad STC_p = \eta_{PV} C \eta_{ECp} \quad (9)$$

$$90 \quad STC = \eta_{PV} C \eta_{EC} \quad (10)$$

91 The EC cell used in our work produced CO and H<sub>2</sub> therefore we estimate *STC* (H<sub>2</sub>) and *STC* (CO) for both  
 92 of the products as well as the total *STC* as their sum.

### 93 **PV-B-EC**

94 The PV conversion efficiency is obtained with Equation 1,

95 The power coupling factor for PV-B-EC,  $C^*$ , is calculated with equation (11)

$$96 \quad C^* = \frac{V_{OP^*} I_{OP^*}}{V_{MPP} I_{MPP}} \quad (11)$$

97  $V_{OP^*}$  and  $I_{OP^*}$  represent the operating current and voltage of the joint B-EC directly connected to PV.

98 PV-B-EC energy coupling efficiency represents how much of the maximum energy deliverable by PV is  
 99 actually being utilized by battery and EC during daytime.

$$100 \quad C = \frac{\int V_{OP^*} I_{OP^*}}{\int V_{MPP} I_{MPP}} = \frac{E_{OP^*}}{E_{MPP}} \quad (12)$$

101 EC power efficiency for a specific product ( $\eta_{EC}$ ) is determined by the product of faradaic efficiency and  
 102 voltage efficiency for that particular chemical.  $\eta_{ECp}$  represents the proportion of the operating power  
 103 (voltage and current) effectively utilized for the production of the specified chemical (Equation 13).

$$104 \quad \eta_{EC} = \sum \eta_{ECp} = \frac{FE_{CO}E_{CO}^0}{V_{OP}} + \frac{FE_{H_2}E_{H_2}^0}{V_{OP}} \quad (13),$$

105 Faradaic efficiency of each product (CO and H<sub>2</sub>) is obtained with equation (14)

$$106 \quad FE_p = \frac{n \times x_p \times F \times CO_2 \text{ flowrate}}{I_{EC(\text{day or night})}} \quad (14)$$

107 Voltage efficiency is determined by equation (15)

$$108 \quad \eta_{VEC} = \frac{E_{CO}^0}{V_{OP}} + \frac{E_{H_2}^0}{V_{OP}} \quad (15)$$

109 In PV-B-EC operation, solar-to-chemical efficiency (STC) can only be evaluated as the ratio between  
 110 cumulative solar energy incident on the exposed PV area during daytime to the cumulative chemical  
 111 energy stored in the products (CO and H<sub>2</sub>) generated by the EC during both day- and night-time operation.  
 112 The cumulative sun energy is calculated with equation (16).

$$113 \quad E_{sun} = \int_0^{t_{day}} G_t A_{PV} dt \quad (16)$$

114 Where  $t_{day}$  is the duration of the simulated “day”.

115 The cumulative energy involved in chemicals formation are obtained with equations (17)-(19).

$$116 \quad E_{CO+H_2}(\text{day}) = \int_0^{t_{day}} E_{CO}^0 FE_{CO} I_{EC} dt + \int_0^{t_{day}} E_{H_2}^0 FE_{H_2} I_{EC} dt \quad (17)$$

117

$$118 \quad E_{CO+H_2}(\text{night}) = \int_{t_{day}}^{t_{night}} E_{CO}^0 FE_{CO} I_{EC} dt + \int_{t_{day}}^{t_{night}} E_{H_2}^0 FE_{H_2} I_{EC} dt \quad (18)$$

119

$$120 \quad E_{CO+H_2} = E_{CO+H_2}(\text{day}) + E_{CO+H_2}(\text{night}) \quad (19)$$

121 Where  $t_{\text{day}}$  is the duration of daytime;  $t_{\text{night}}$  is the duration of the night required for all the PV energy stored  
122 in the battery during the day to be fully utilized by the electrochemical cell.

123 Solar to chemical efficiency is, then, calculated with equation (18)

$$124 \quad STC = E_{CO+H_2}/E_{\text{sun}} \quad (18)$$

125

126

127

128

129

130

131 **Operating power of EC in PV-EC configuration in comparison with PV-B-EC**

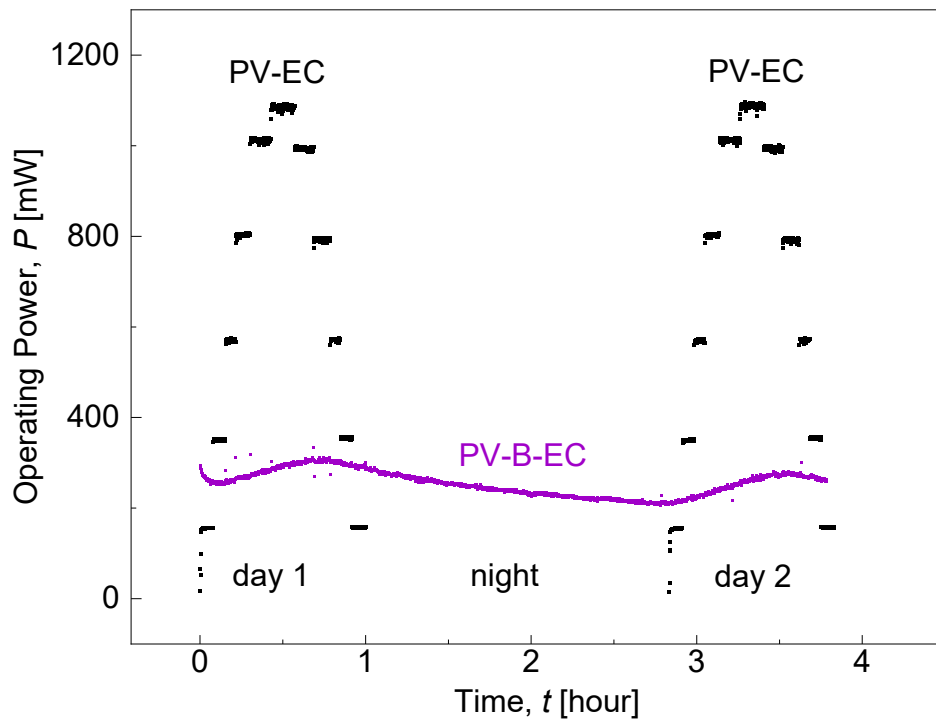

132

133

Figure S4. Comparison of electrochemical cell's operating power in PV-EC and PV-B-EC configuration.

134

135

136

137

138

139

140

141

142

143

144 **Microstructural analysis of Ag nanoparticles under fluctuating versus under constant voltage**

145

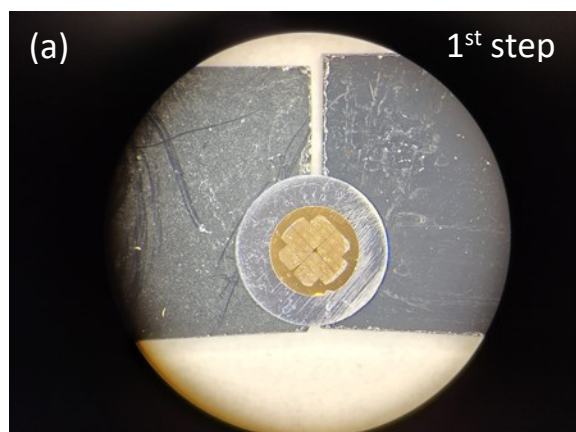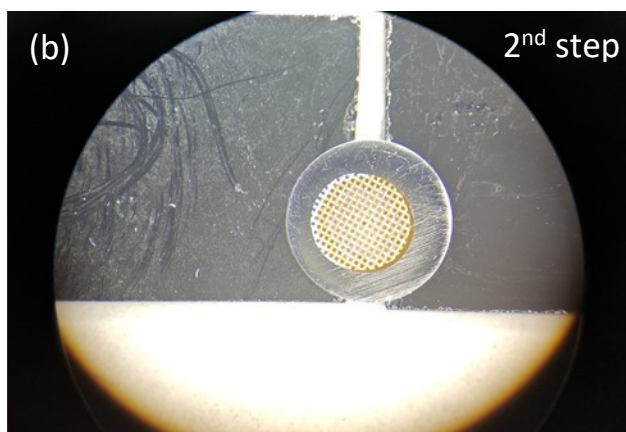

146

147

148

149

150

151

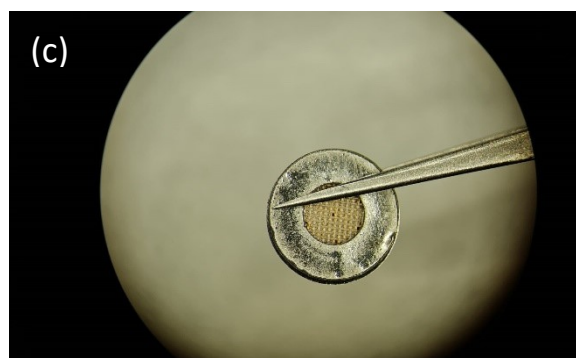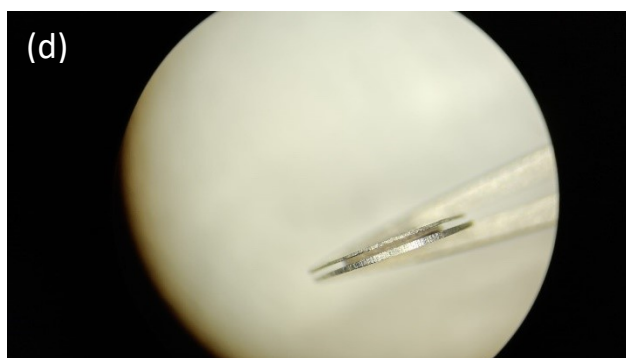

152

Figure S5. The fabrication procedure of Ag TEM-grid cathodes with 1<sup>st</sup> step: Ag-containing finder grid laying on the Plasma-cleaned ring and 2<sup>nd</sup> step: Nylon grid covering Ag-containing finder grid and another plasma-cleaned ring to close the sandwich-like setup. (a) Front view of inverted tweezer holding Ag TEM-grid cathode. (b) Side view of inverted tweezer holding Ag TEM-grid cathode.

153

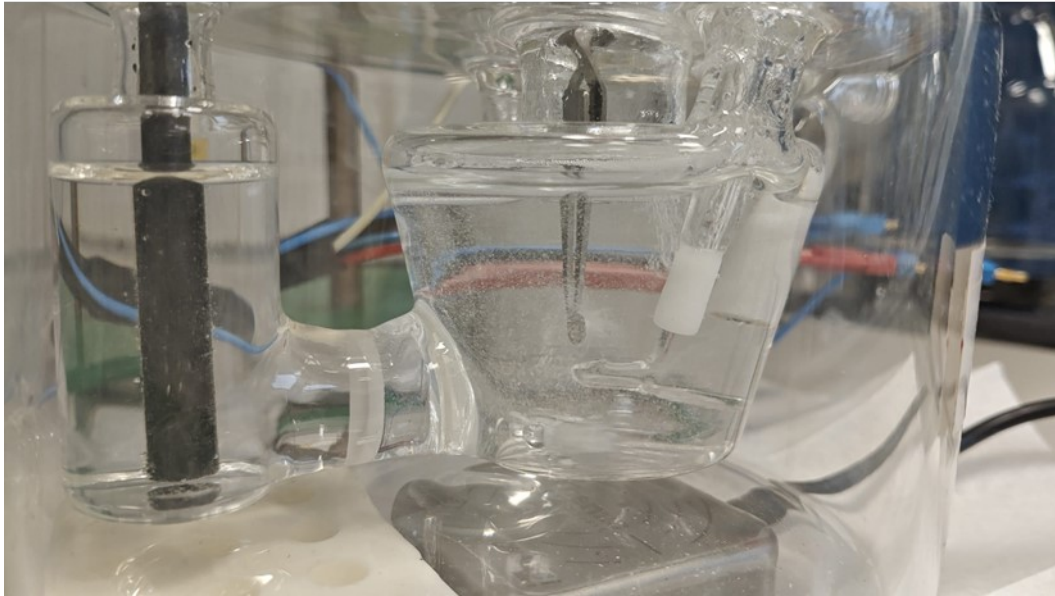

154

155 Figure S6. Close-up of electrodes in custom-made H-cell operating with 1M  $\text{KHCO}_3$  at approximately 25°C, the experimental setup  
156 for  $\text{CO}_2$  reduction used TEM-grid deposited with Ag as cathode and graphite rod as counter electrode

157

158

159

160

161

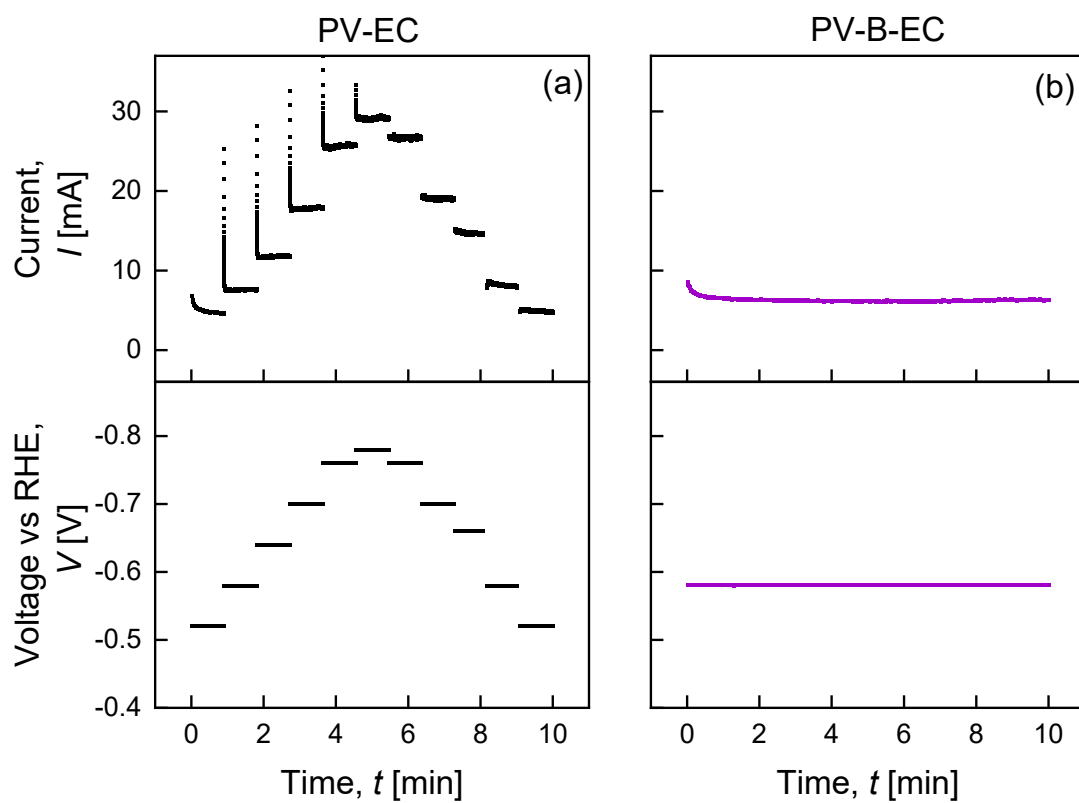

162

163 Figure S7. current-voltage behaviors of TEM grid deposited with Ag as cathode (a) Fluctuating operating voltage simulating PV-  
 164 EC scenario (b) Constant operating voltage of -0.58V simulating PV-B-EC configuration.

165

166

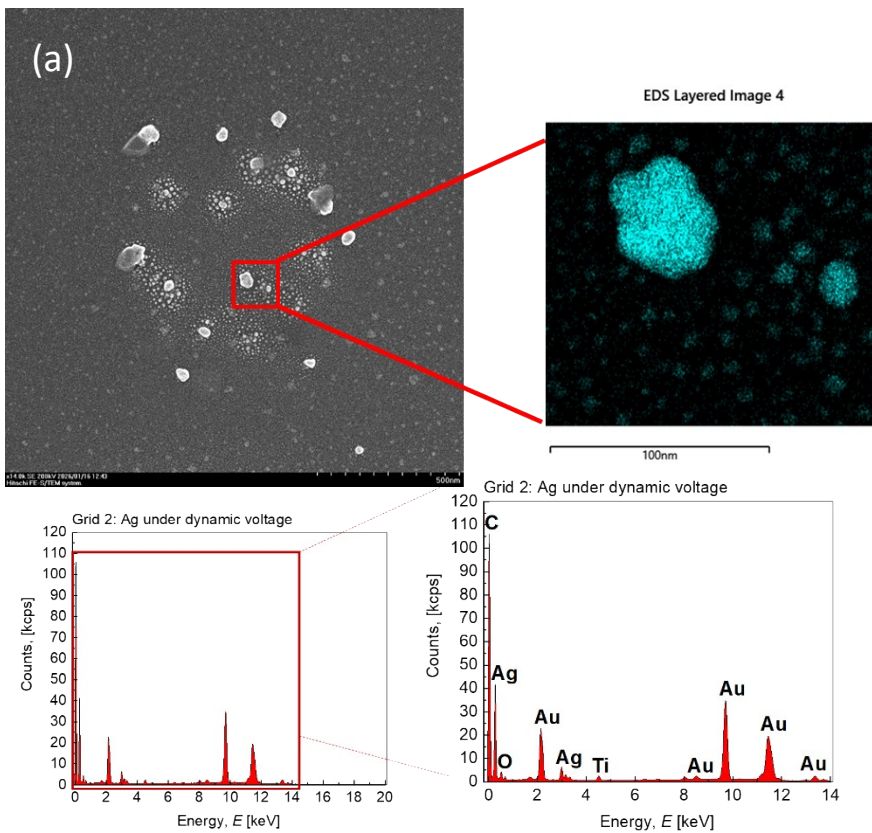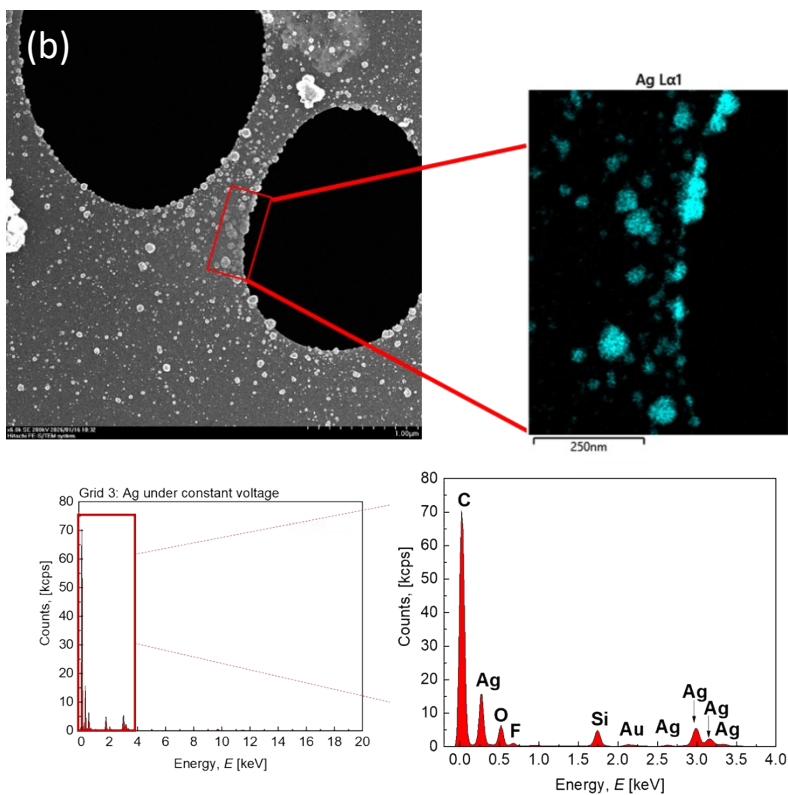

168 Figure S8. Secondary electron images (left) of small particle aggregates. The regions highlighted by red squares were  
169 analyzed by energy-dispersive X-ray spectroscopy (EDX), with the corresponding EDX spectra and silver elemental  
170 maps shown on the right. (a) Grid 2: Ag after electrolysis under a dynamic voltage profile. (b) Grid 3: Ag after  
171 electrolysis under a constant voltage profile.

172

173 **Analysis of the results, synergy in B-EC operation and efficiency beyond the limit**

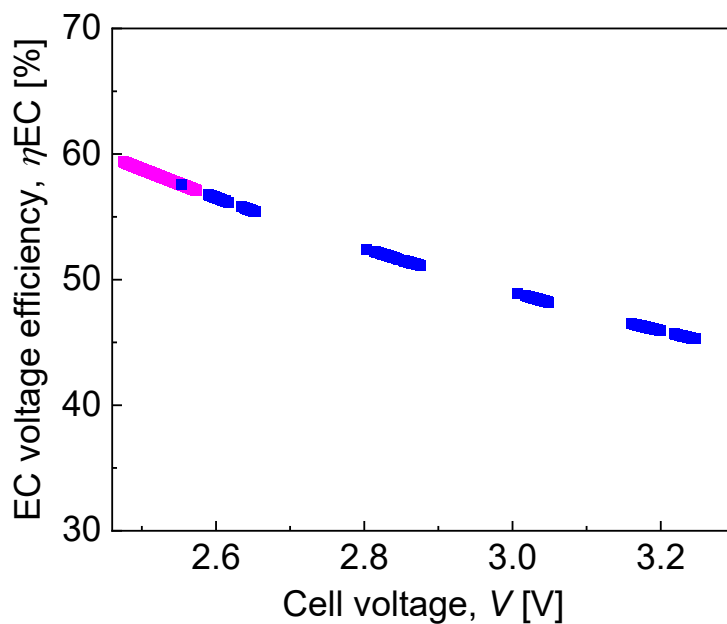

174

175

Figure S9. Hyperbolic dependence of EC voltage efficiency with EC voltage

176

177

178

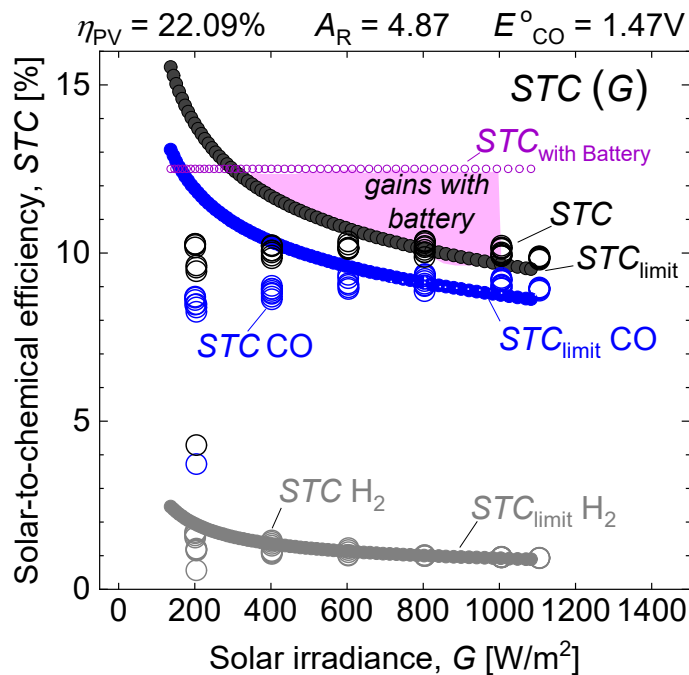

Figure S10. Comparison of theoretical solar-to-chemical efficiency limit  $STC_{limit}$  calculated for our EC using  $\eta_{PV} = 22.09\%$  and PV-to-EC area ratio  $A_R = 4.87$  with the measured solar-to-chemical efficiencies of the PV-EC system.  $STC_{limit}$  are presented as filled circles (black:  $CO+H_2$ , blue:  $CO$ , grey:  $H_2$ ), while the experimentally measured  $STC$  values for the PV-EC configuration are shown as hollow circles in the same color scheme. The measured  $STC$  values for the PV-B-EC device are displayed as pink hollow circles and exceed the  $STC_{limit}$  attainable by the PV-EC reference system.
